# Supplementary material for: Biosynthesis of α-elostearic Acid in the Seed of Momordica Charantia L.
Source: Research Square preprint supplement (doi:10.21203/rs.3.rs-119517/v1), 2020-12-09
Supplement: Supplementary file 1 [file 8dd526df7906106c81bef865.docx]

**Biosynthesis of α-elostearic acid in the seed of *Momordica charantia* L.**

Katarzyna Jasieniecka-Gazarkiewicz*, Sylwia Klińska, Antoni Banaś

Intercollegiate Faculty of Biotechnology, University of Gdansk and Medical University of Gdansk, Abrahama 58, 80-307 Gdansk, Poland

* Corresponding author. Tel.: +48 58 523 6343

*E-mail address:* katarzyna.jasieniecka@biotech.ug.edu.pl

**SUPPLEMENTARY MATERIALS**


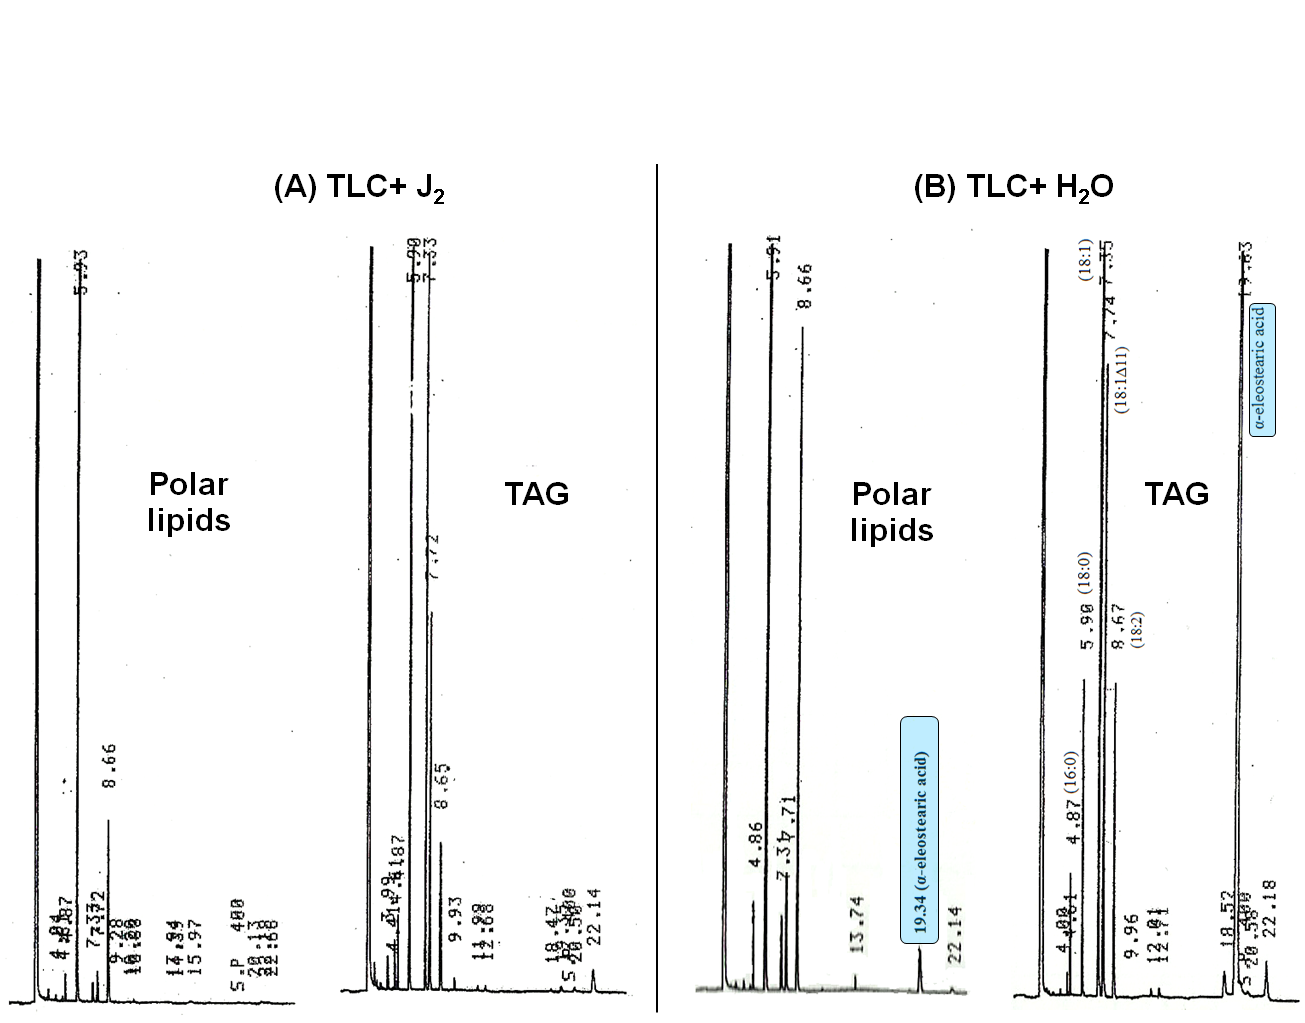


Fig. S1. Identification of *Momordica charantia* lipids on TLC by a brief exposure to iodine vapour (A) and by water spraying (B). Exposure of TLC to iodine vapour destroys α-eleostearic acid.

**Table S1. Lipid content in developing seeds of *Momordica charantia* L.**

| Seeds | | Fatty acid composition [%] | | | | | | |
| --- | --- | --- | --- | --- | --- | --- | --- | --- |
| DAP | **µmol FA/ seed** | **16:0** | **18:0** | **18:1** | **18:2** | **X1** | **αESA** | **X2** |
| **20 DAP** | **4.1**±2.3 | **7.9**±2.7 | **7.7**±2.3 | **30.7**±3.6 | **37.7**±8.0 | **0.3**±0.3 | **11.7**±7.0 | **0.7**±0.7 |
| **23 DAP** | **32.9**±7.0 | **2.3**±0.4 | **16.7**±0.7 | **15.0**±1.0 | **14.5**±2.1 | **2.2**±0.4 | **45.2**±2.3 | **3.3**±1.3 |
| **26 DAP** | **73.6**±4.2 | **1.6**±0.1 | **19.0**±0.5 | **10.3**±0.3 | **7.5**±0.5 | **1.6**±0.4 | **56.0**±0.8 | **3.0**±0.5 |
| **33 DAP** | **115.4**±2.0 | **1.6**±0.1 | **18.7**±0.2 | **10.4**±0.2 | **6.9**±0.2 | **1.3**±0.2 | **57.6**±1.5 | **2.9**±0.8 |

Average values ± SD are presented (n≥3); αESA – α-eleostearic acid; X1 and X2 – not identified fatty acids (X1 localised just before αESA and X2 just after αESA peak)

**Table S2. Content and composition of fatty acids in different lipid classes of developing seeds of *Momordica charantia* L.**

| Seeds | | | Fatty acid composition [mol%] | | | | | | |
| --- | --- | --- | --- | --- | --- | --- | --- | --- | --- |
| DAP | **Lipid class** | **% of ∑ FA in all lipids** | **16:0** | **18:0** | **18:1** | **18:2** | **X1** | **αESA** | **X2** |
| **20 DAP** | Polar | 21.1  ±0.7 | 12.7  ±0.2 | 5.3  ±0.1 | 21.4  ±0.6 | 56.3  ±0.6 | n.d. | 1.5  ±0.1 | n.d. |
| **DAG** | 3.6  ±0.3 | 5.6  ±0.7 | 14.5  ±0.1 | 35.4  ±0.2 | 22.3  ±0.8 | n.d. | 18.9  ±1.1 | 1.8  ±0.1 |
| **TAG** | 75.3  ±0.9 | 5.1  ±0.2 | 9.8  ±0.3 | 35.5  ±0.3 | 27.2  ±0.2 | 0.3  ±0.1 | 20.1  ±0.6 | 0.8  ±0.1 |
| **23 DAP** | **Polar** | 4.6  ±**0.2** | 8.1  ±0.5 | 8.4  ±0.6 | 11.0  ±0.3 | 69.8  ±0.3 | n.d. | 2.0  ±0.1 | n.d |
| **DAG** | 1.5  ±0**.2** | 2.7  ±0.3 | 29.3  ±1.1 | 14.1  ±0.3 | 13.6  ±0.4 | n.d. | 37.4  ±0.7 | 2.2  ±0.4 |
| **TAG** | 93.7  ±0.1 | 1.9  ±0.2 | 16.8  ±1.0 | 14.9  ±0.4 | 9.9  ±0.5 | 0.3  ±0.1 | 52.6  ±1.1 | 3.3  ±1.0 |
| **26 DAP** | **Polar** | 2.3  ±0.4 | 6.6  ±0.5 | 9.9  ±1.2 | 12.5  ±0.4 | 66.2  ±1.4 | n.d. | 4.2  ±0.6 | 0.4  ±0.1 |
| **DAG** | 0.8  ±0.2 | 2.4  ±0.1 | 24.7  ±1.7 | 14.1  ±0.5 | 11.3  ±0.4 | n.d. | 44.2  ±1.0 | 2.2  ±0.5 |
| **TAG** | 96.8  ±0.6 | 1.4  ±0.1 | 20.4  ±1.0 | 10.4  ±0.1 | 5.8  ±0.1 | 1.0  ±0.2 | 58.3  ±0.7 | 2.4  ±0.5 |
| **33 DAP** | **Polar** | 1.4  ±0.4 | 7.3  ±1.3 | 17.7  ±0.2 | 17.1  ±0.3 | 50.9  ±0.3 | n.d. | 6.1  ±1.0 | 0.4  ±0.1 |
| **DAG** | 0.5  ±0.1 | 2.9  ±0.1 | 21.5  ±0.5 | 13.9  ±0.1 | 13.2  ±1.1 | n.d. | 44.5  ±0.4 | 2.4  ±0.6 |
| **TAG** | 98.1  ±0.4 | 1.4  ±0.1 | 19.5  ±1.6 | 9.8  ±0.2 | 5.7  ±0.1 | 1.4  ±0.1 | 60.0  ±1.8 | 1.7  ±0.1 |

For analyses of different lipid classes separate extracts from individual 3 or 4 seeds (used for total fatty acids analyses in the seeds at different stage of development) were mixed together and aliquots were separated on TLC (n=3)

**Table S3. Accumulation of different fatty acids in acyl-lipids of *Momordica charantia* seeds at different time of its development.**

| **FA** | **Time period** | | |
| --- | --- | --- | --- |
| **20-23 DAP**  **[µmol/day/seed]** | **23-26 DAP**  **[µmol/day/seed]** | **26-33 DAP**  **[µmol/day/seed]** |
| **16:0** | **0.15** | **0.14** | **0.11** |
| **18:0** | **1.73** | **2.83** | **1.26** |
| **18:1** | **1.23** | **0.88** | **0.74** |
| **18:2** | **1.09** | **0.25** | **0.41** |
| **αESA** | **4.80** | **8.79** | **4.20** |

Average increase of individual fatty acids in acyl-lipids (presented in Fig.2) in the time period indicated in the table were divided by the number of the days of that periods.
